# Supplementary material for: Stabilizing the optical properties of PFO through addition of a non-volatile low molecular weight aromatic ether
Source: Royal Society of Chemistry journal article supplement (doi:10.1039/c0jm01615b), 2010-01-01
Supplement: c0jm01615b.pdf [file c0jm01615b.pdf]

### Electronic Supplementary Information

**Table ESI-1** Ratio of green (500-600 nm) to blue (400-500 nm) integrated intensity for select spectra.

| <b>Spectrum</b>           | <b>Film</b>                     | <b>Green/Blue ratio</b> |
|---------------------------|---------------------------------|-------------------------|
| Figure 5-I dashed blue    | Annealed 1-1 blend              | 0.30                    |
| Figure 5-II dashed black  | Annealed 3-1 blend              | 0.56                    |
| Figure 5-III dashed green | Annealed 5-1 blend              | 0.69                    |
| Figure 5-IV dashed orange | Annealed 8-1 blend              | 0.74                    |
| Figure 5-V dashed red     | Annealed PFO                    | 2.44                    |
| Figure 6 blue             | PFO re-annealed with PPE on top | 0.60                    |
| Figure 6 green            | Annealed PFO                    | 1.33                    |
| Figure 6 red              | Re-annealed PFO                 | 1.63                    |

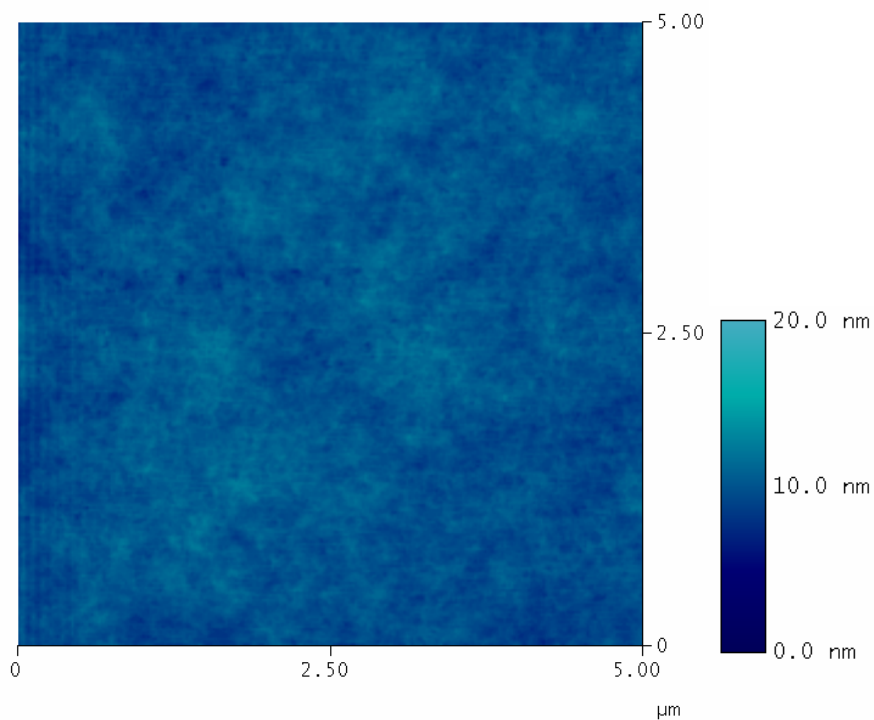

Figure ESI-1: AFM image of thin film cast from 1-1 blend.

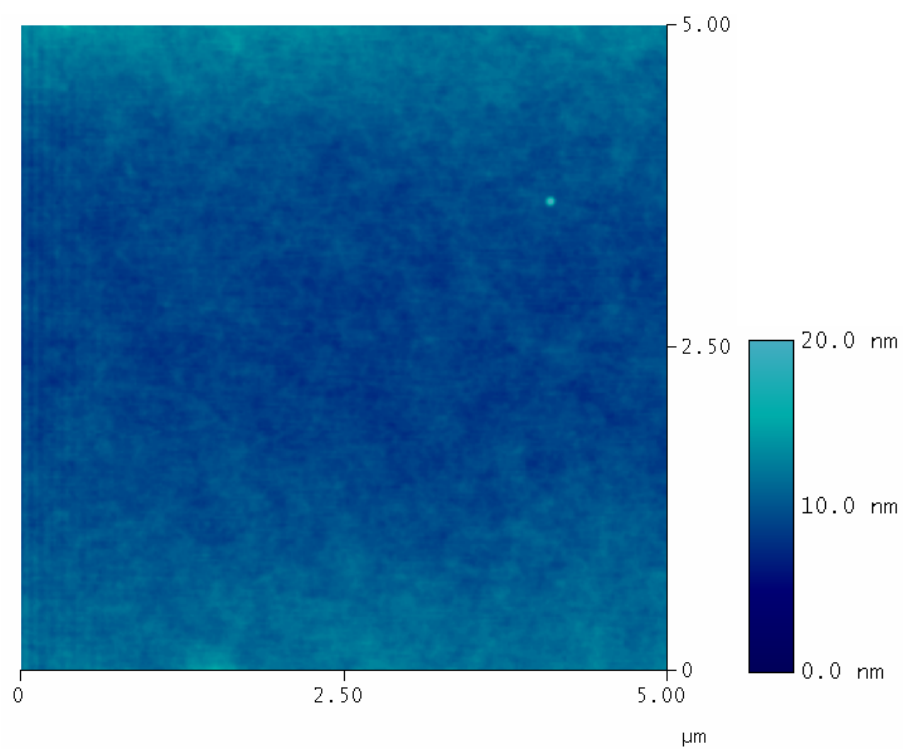

Figure ESI-2: AFM image of thin film cast from 3-1 blend.

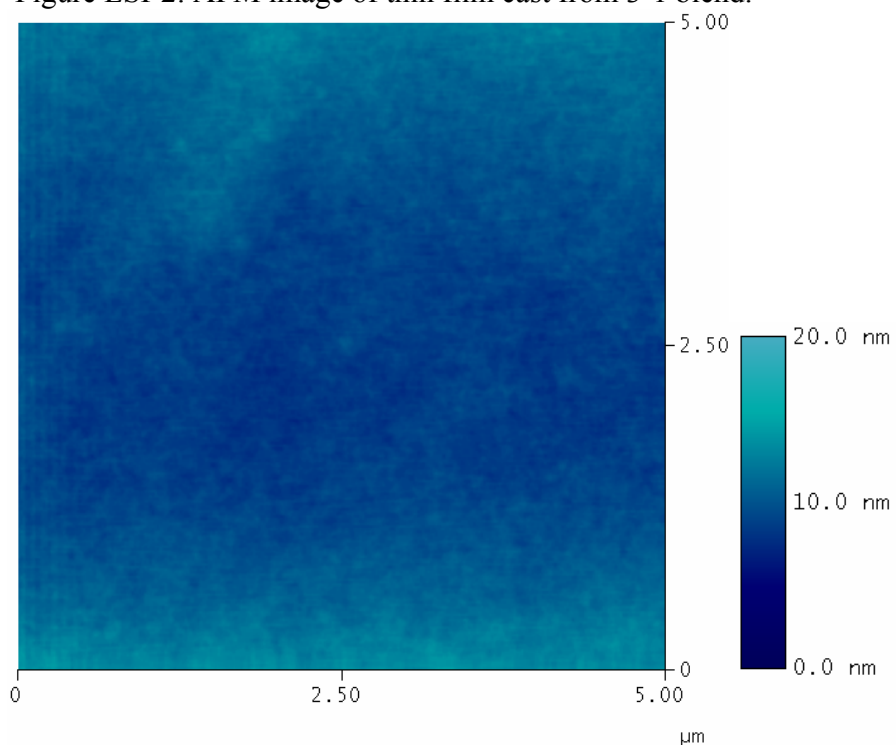

Figure ESI-3: AFM image of thin film cast from 5-1 blend.

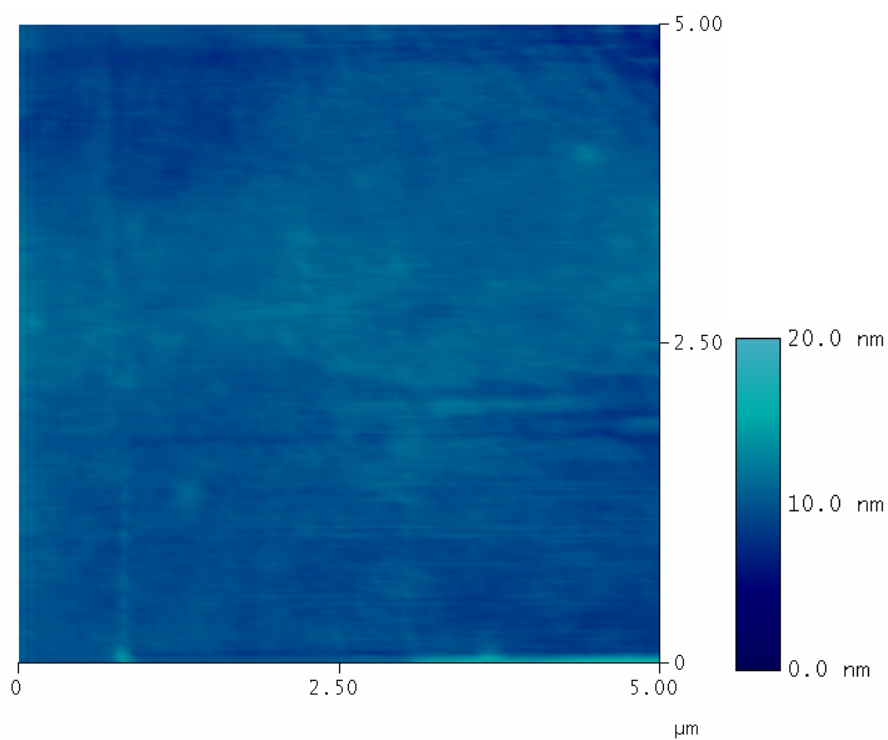

Figure ESI-4: AFM image of thin film cast from 8-1 blend.

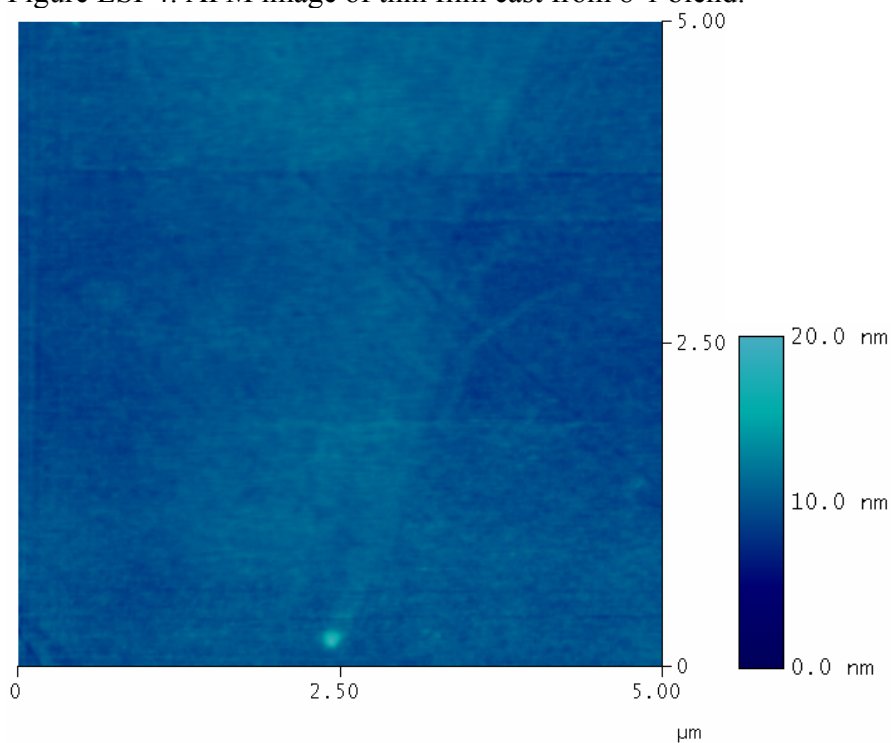

Figure ESI-5: AFM image of thin film cast from PFO.

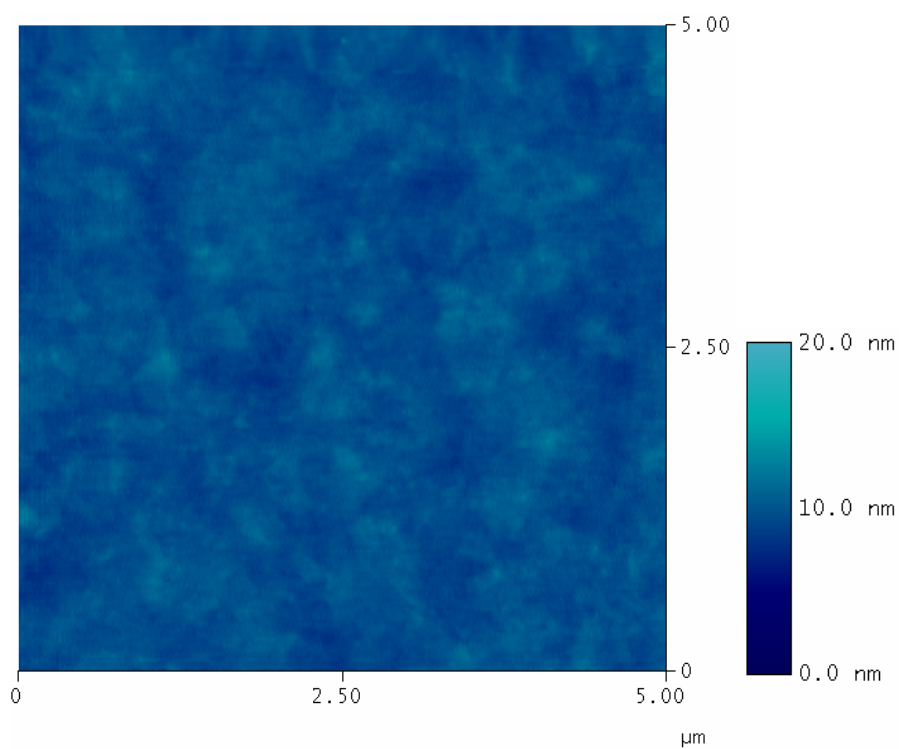

Figure ESI-6: AFM image of thin film cast from 1-1 blend after annealing in air for 60 minutes.

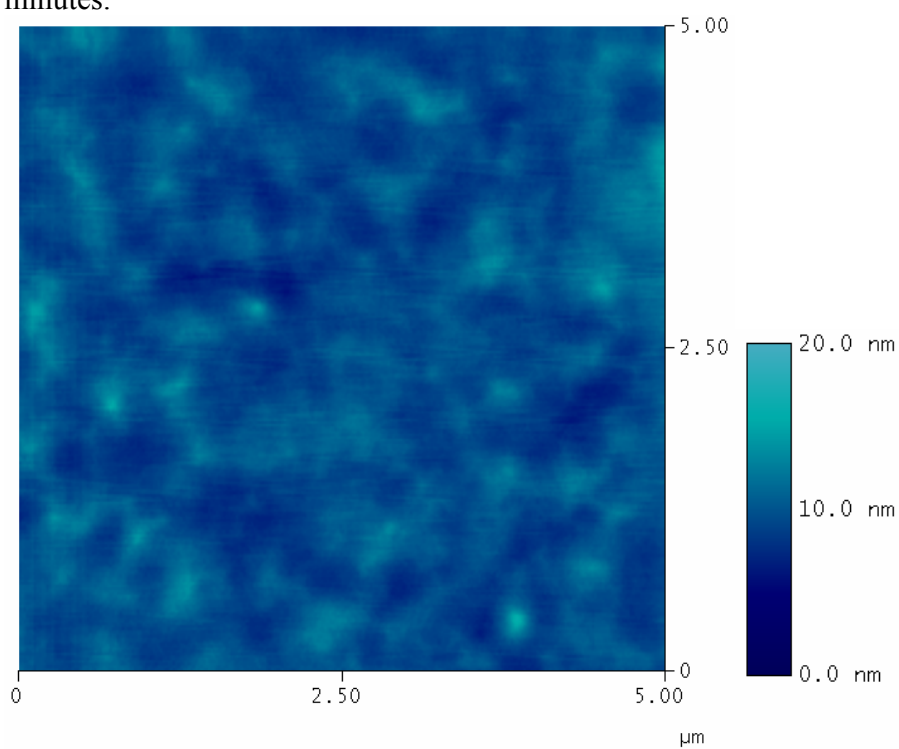

Figure ESI-7: AFM image of thin film cast from 3-1 blend after annealing in air for 60 minutes.

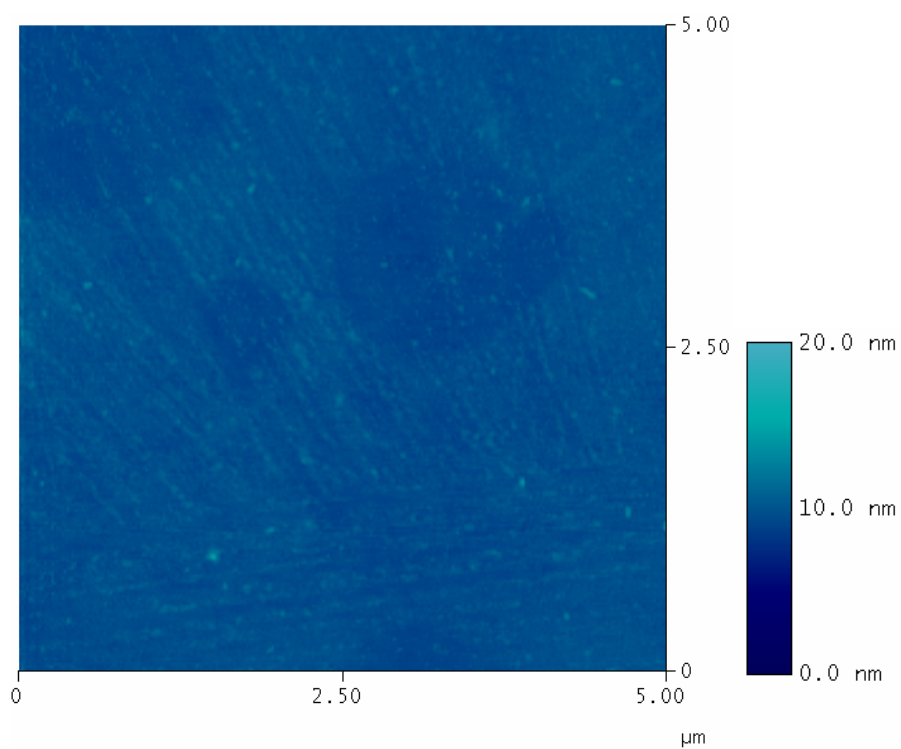

Figure ESI-8: AFM image of thin film cast from 5-1 blend after annealing in air for 60 minutes.

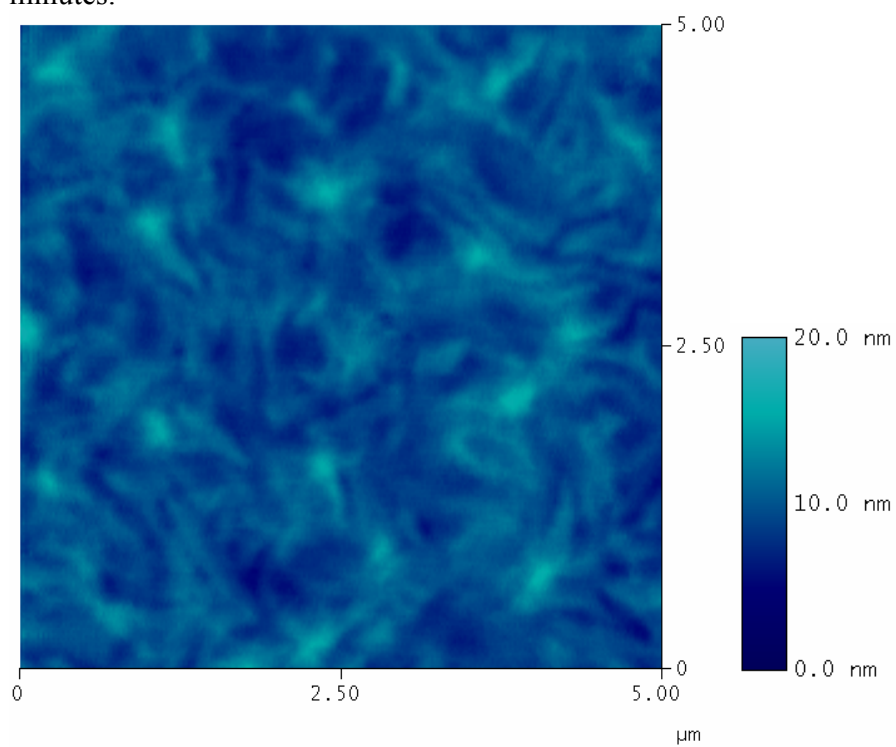

Figure ESI-9: AFM image of thin film cast from 8-1 blend after annealing in air for 60 minutes.

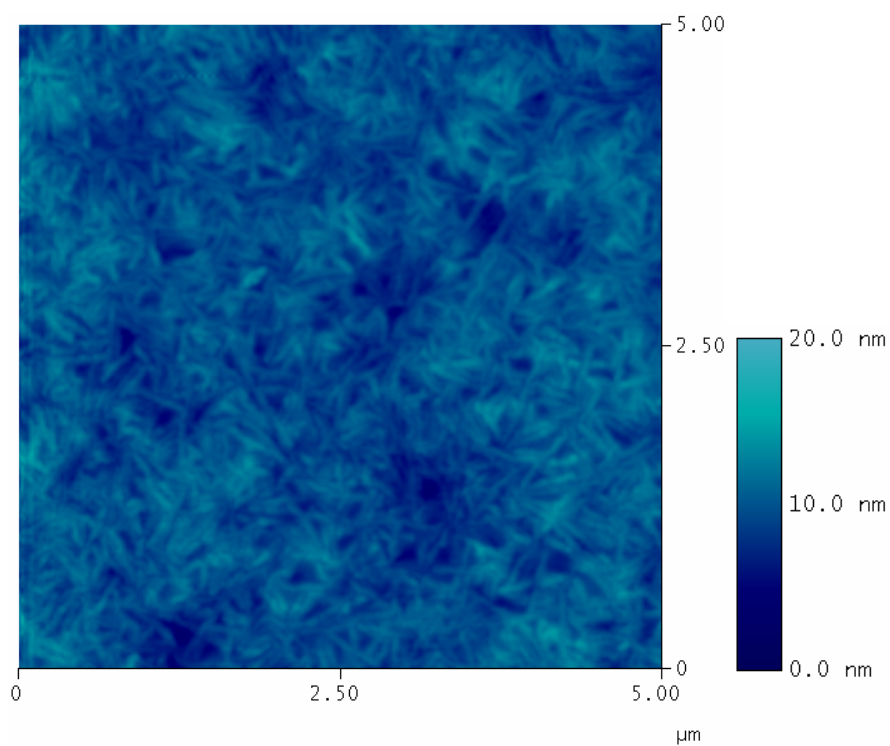

Figure ESI-10: AFM image of thin film cast from PFO after annealing in air for 60 minutes.

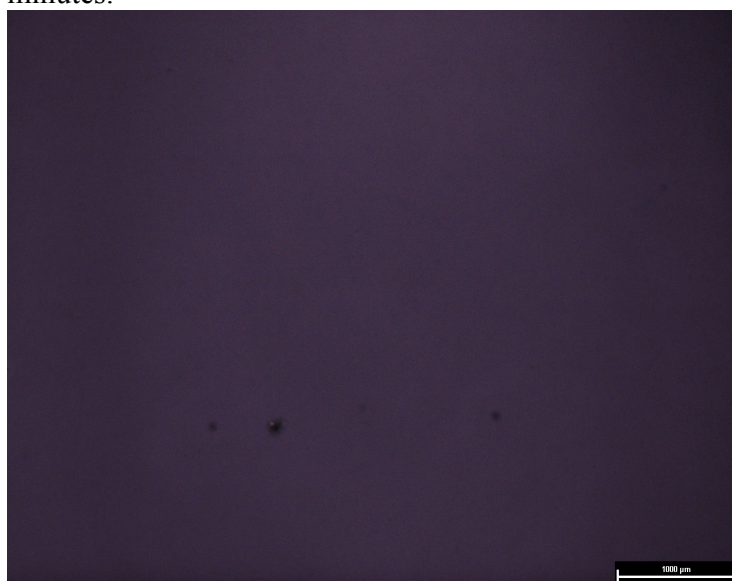

Figure ESI-11: PLM image of thin film cast from 1-1 blend.

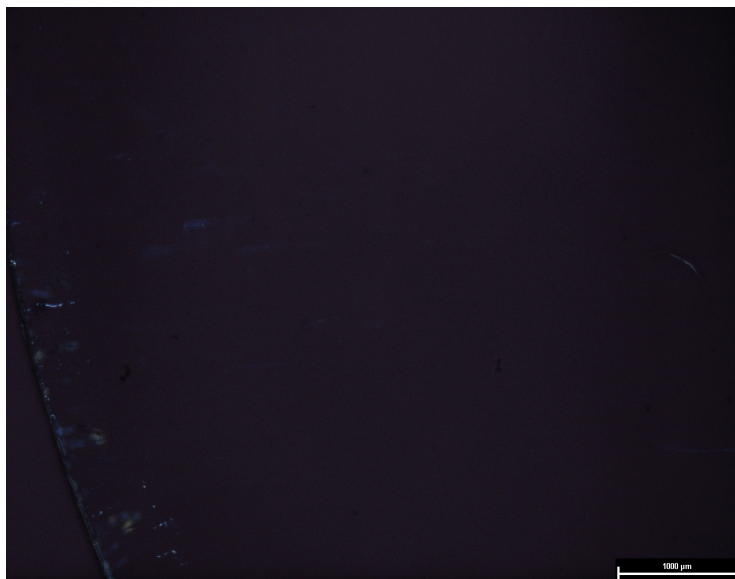

Figure ESI-12: PLM image of thin film cast from 3-1 blend.

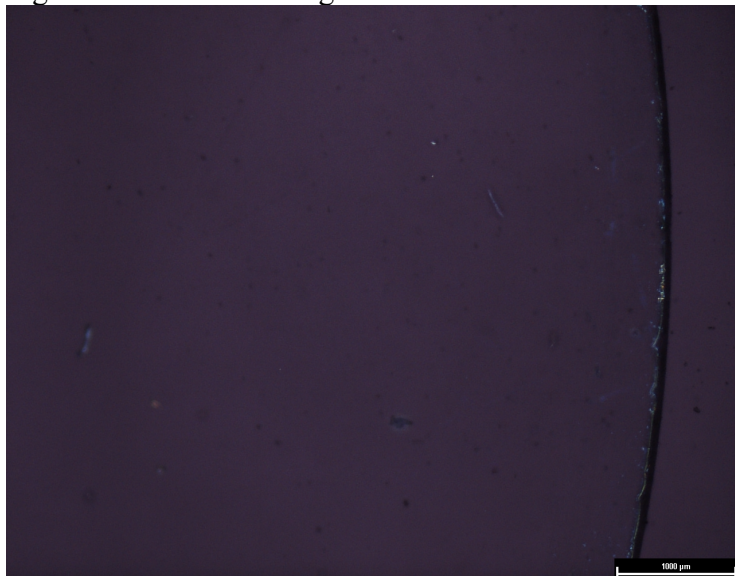

Figure ESI-13: PLM image of thin film cast from 5-1 blend.

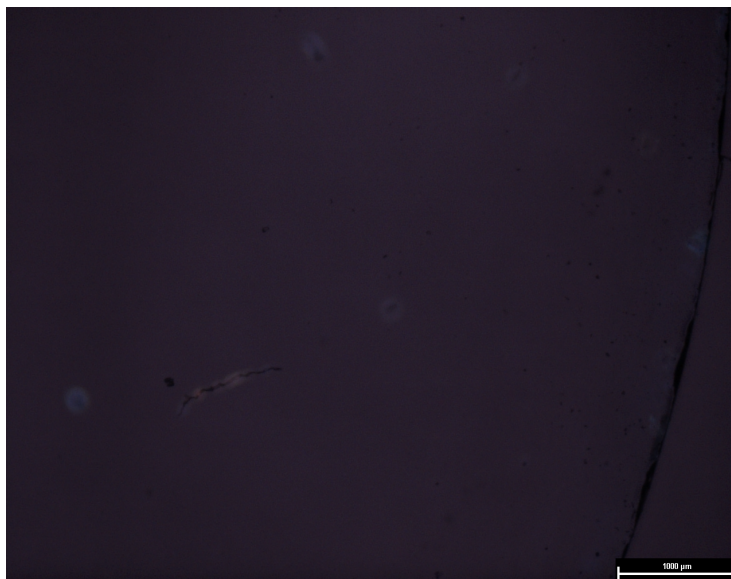

Figure ESI-14: PLM image of thin film cast from 8-1 blend.

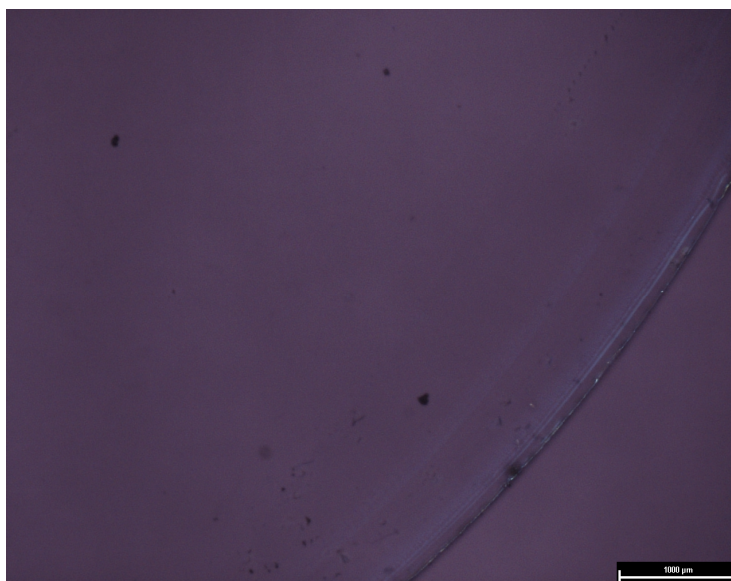

Figure ESI-15: PLM image of thin film cast from PFO.



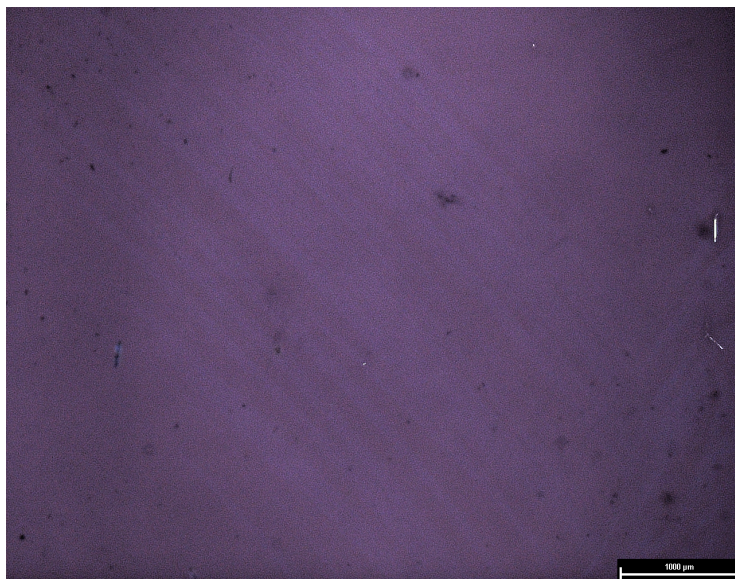

Figure ESI-16: PLM image of thin film cast from 1-1 blend after annealing in air for 60 minutes.

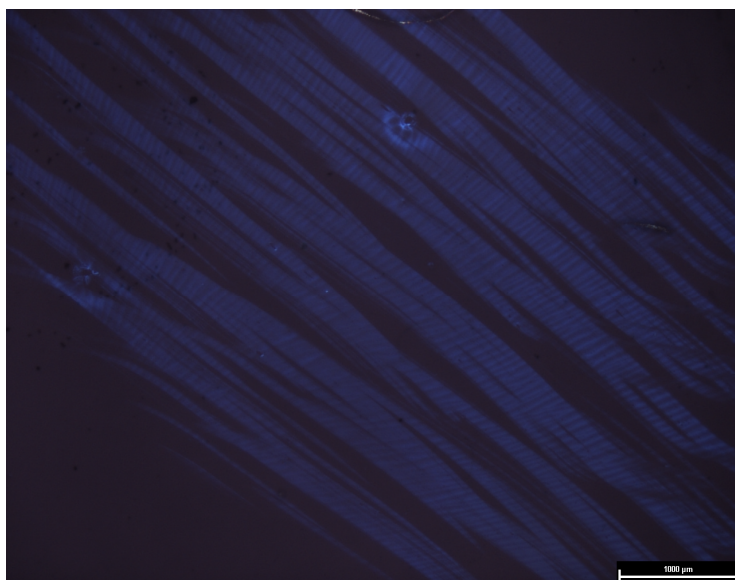

Figure ESI-17: PLM image of thin film cast from 3-1 blend after annealing in air for 60 minutes.

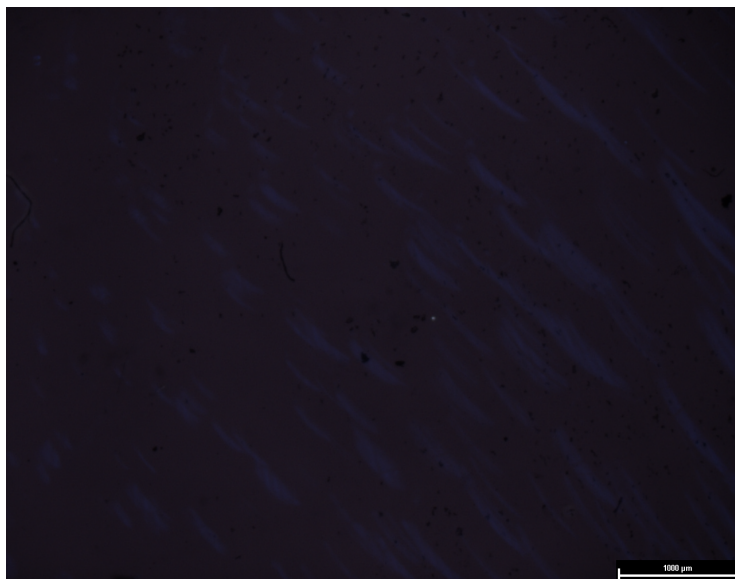

Figure ESI-18: PLM image of thin film cast from 5-1 blend after annealing in air for 60 minutes.

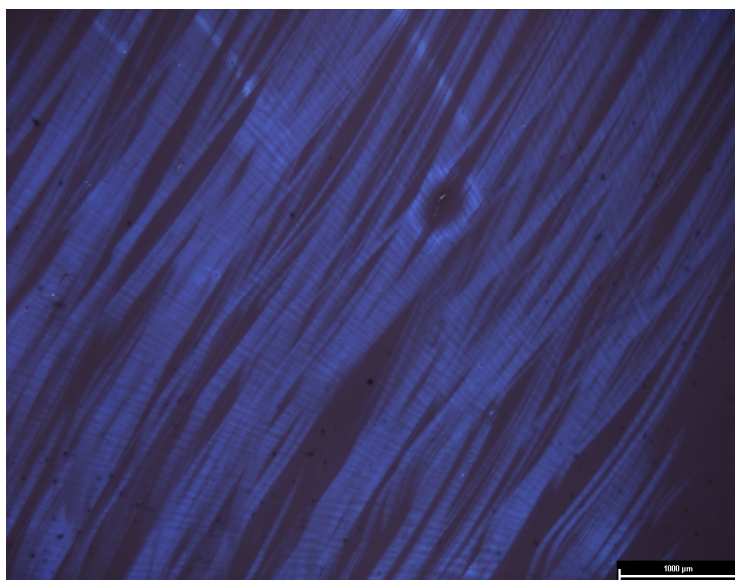

Figure ESI-19: PLM image of thin film cast from 8-1 blend after annealing in air for 60 minutes.

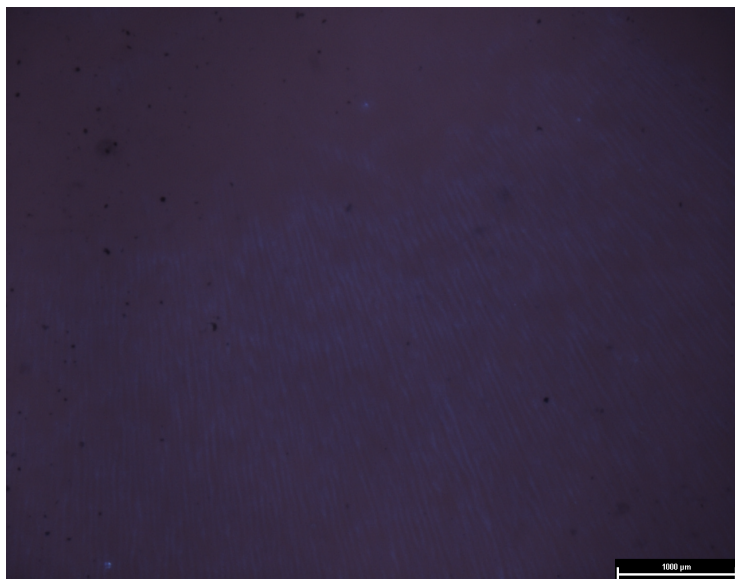

Figure ESI-20: PLM image of thin film cast from PFO after annealing in air for 60 minutes.

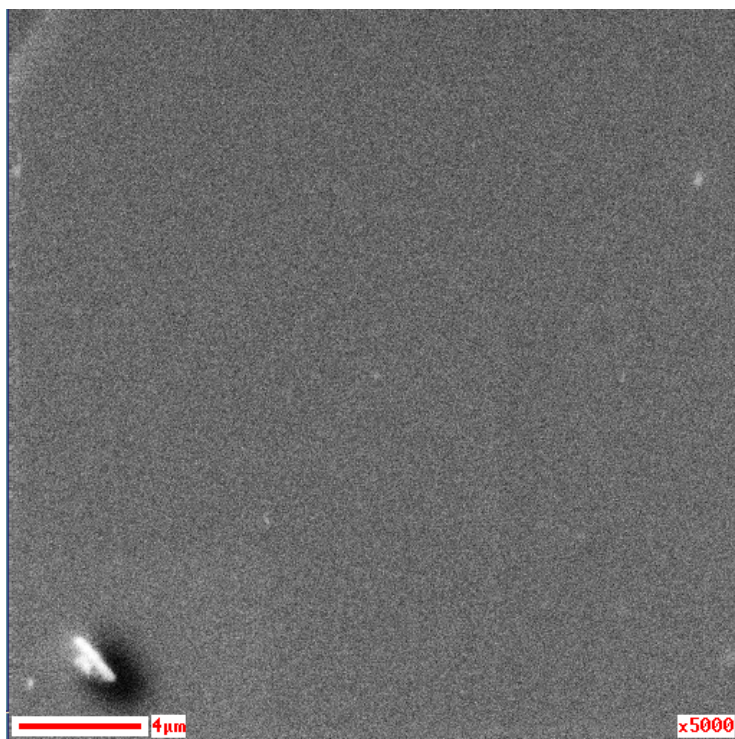

Figure ESI-21: SEM image of thin film cast from 1-1 blend.

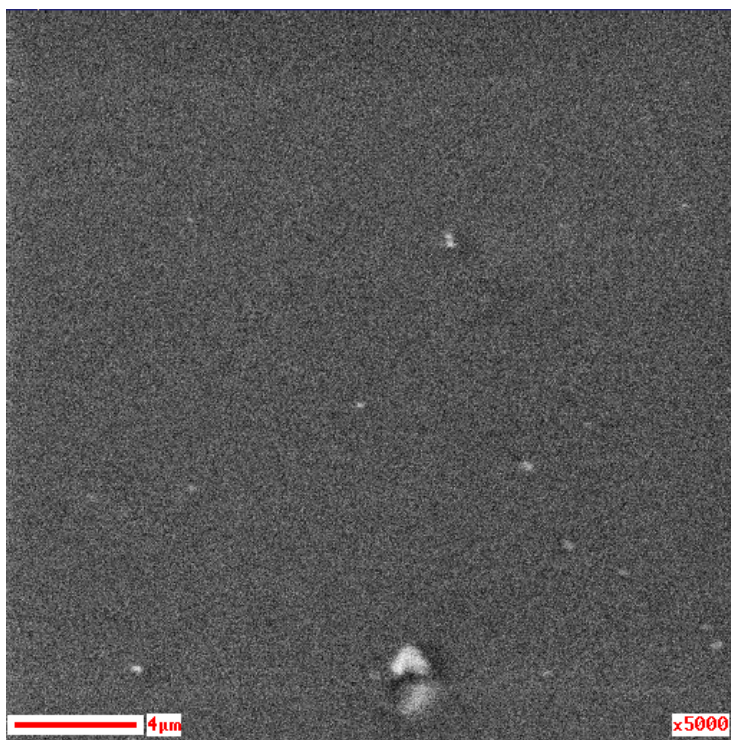

Figure ESI-22: SEM image of thin film cast from PFO.

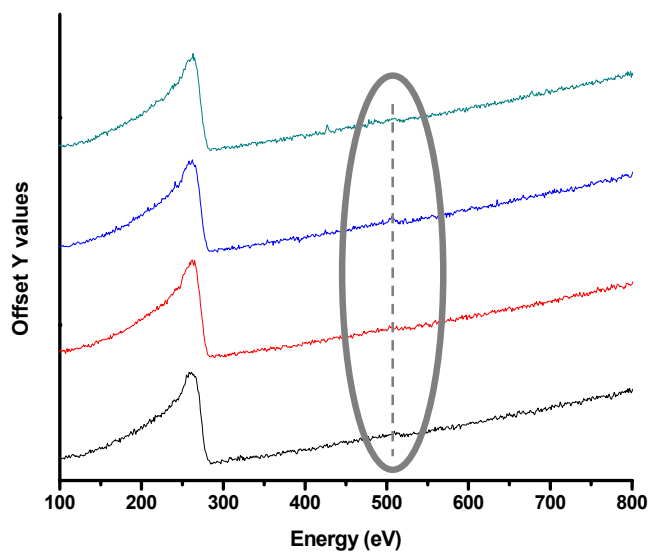

Figure ESI-23: Stacked AES spectra measured at four different points on thin film cast from 1-1 blend, showing carbon peak at ca. 260 nm, and a weak oxygen peak at ca. 510 nm (highlighted by the grey oval/dotted line).

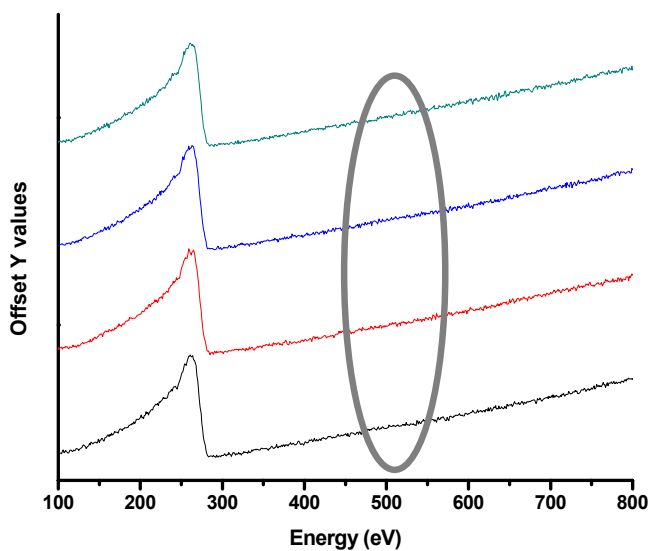

Figure ESI-24: Stacked AES spectra measured at four different points on thin film cast from PFO, showing a carbon peak at ca. 260 nm, and no oxygen peak (highlighted by the grey oval).

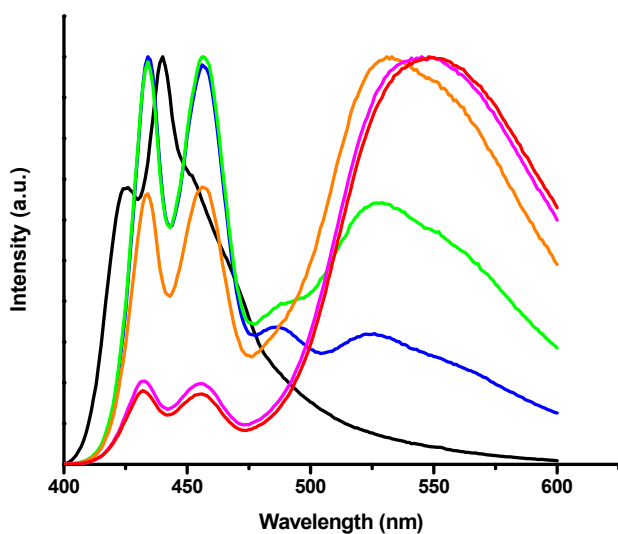

Figure ESI-25: Normalized photoluminescence spectra of a PFO thin film (ca. 100nm) measured prior to (black) and following annealing in air ( $\lambda_{\text{ex}}=350\text{nm}$ ) for one hour (blue), three hours (green), five hours (orange), twenty-two hours (pink), and twenty-five hours (red).

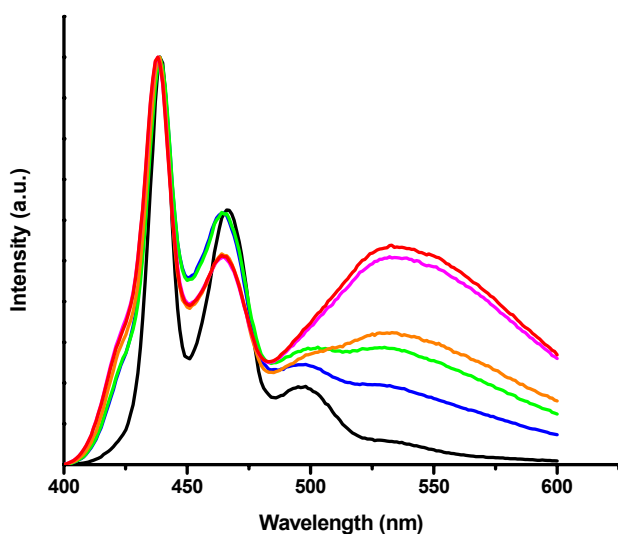

Figure ESI-26: Normalized photoluminescence spectra of a 1-1 blend thin film (ca. 100nm) measured prior to (black) and following annealing in air ( $\lambda_{\text{ex}}=350\text{nm}$ ) for one hour (blue), three hours (green), five hours (orange), twenty-two hours (pink), and twenty-five hours (red).

**PLED Fabrication and testing.** Indium-tin oxide (ITO)-coated glass substrates (8-12 ohm/sq, Delta Technologies) were pre-cleaned by sonicating three times each in detergent (Sparkleen 1), distilled water, methanol, acetone and 2-propanol. The clean dry substrates were then exposed to an oxygen plasma using a Plasmalab MicroEtch RIE for one minute in preparation for deposition of a PEDOT:PSS layer. This layer was spin-coated using a Head-way resist spinner at 500 rpm for 5 seconds, followed by 1000 rpm for 10 seconds and finally 4000 rpm for 45 seconds. This thin film (ca. 60 nm) was annealed in air for ten minutes in a class 10 cleanroom at 60°C. The emissive layer was prepared by spin-coating either PFO or the 1-1 blend from  $\text{CHCl}_3$  (using the same protocol described above). An aluminum cathode was subsequently thermally evaporated onto the organic layered structure in a vacuum deposition system located in a Nitrogen filled MBraun glovebox. Electroluminescent (EL) measurements were taken at 0.1 mA with a Gigahertz-Optik X4-OLED Light Analyzer, and a Varian Cary Eclipse Fluorescence Spectrophotometer; IV curves were recorded with a Gigahertz-Optik X4-OLED Light Analyzer. The current was measured as voltage was increased by 0.1 volts/step from 0 to 10 volts, holding for 0.5 seconds at each step.
